# Supplementary material for: The Effectiveness of First-Generation iStent Microbypass Implantation Depends on Initial Intraocular Pressure: 24-Month Follow-Up—Prospective Clinical Trial
Source: Hindawi journal article supplement (doi:10.1155/2020/8164703), 2020-06-23
Supplement: f1 [file 8164703.f1.pdf]

Supplementary materials

Table 2: Intraocular pressure (IOP) before and 24 months after surgery

| <b>IOP, mmHg</b> | <b>n</b> | <b>Mean (SD)</b> | <b>Median (Range)</b> | <b>MD (95% CI)</b>   | <b>p*</b> |
|------------------|----------|------------------|-----------------------|----------------------|-----------|
| Washout          | 65       | 22.05±2.40       | 21.00 (19.00;26.00)   | -5.00 (-6.50; -5.00) | <0.001    |
| 24 months        | 65       | 16.20±2.37       | 16.00 (11.00;22.00)   |                      |           |

\* Wilcoxon signed rank test, MD – difference in medians calculated as 24 months minus washout with 95% confidence interval

Table 3: Intraocular pressure (IOP) before and 24 months after surgery within groups

| <b>IOP, mmHg</b>   | <b>n</b> | <b>Mean (SD)</b> | <b>Median (Range)</b> | <b>MD (95% CI)</b>   | <b>p*</b> |
|--------------------|----------|------------------|-----------------------|----------------------|-----------|
| <b>IOP &lt; 26</b> |          |                  |                       |                      |           |
| Washout            | 47       | 21.03±1.44       | 21.00 (19.00;24.00)   | -5.00 (-6.00; -4.50) | <0.001    |
| 24 months          | 47       | 15.60±2.12       | 16.00 (11.00;20.00)   |                      |           |
| <b>IOP ≥26</b>     |          |                  |                       |                      |           |
| Washout            | 18       | 26.00±0.00       | 26.00 (26.00;26.00)   | -7.00 (-9.00; -6.00) | 0.009     |
| 24 months          | 18       | 18.56±1.81       | 19.00 (16.00;22.00)   |                      |           |

\* Wilcoxon signed rank test, MD – difference in medians calculated as 24 months minus washout with 95% confidence interval.

Table 4: Intraocular pressure (IOP) mean values, median values, standard deviations, and range between the groups at specific times after surgery

| <b>IOP (mmHg)</b> | <b>IOP &lt; 26</b> |                       | <b>IOP ≥26</b>   |                       | <b>MD (95% CI)</b>  | <b>p*</b> |
|-------------------|--------------------|-----------------------|------------------|-----------------------|---------------------|-----------|
|                   | <b>Mean (SD)</b>   | <b>Median (Range)</b> | <b>Mean (SD)</b> | <b>Median (Range)</b> |                     |           |
| 0                 | 17.97±2.55         | 18.00 (12.00;24.00)   | 21.72±4.74       | 21.15 (14.20;30.90)   | -3.15 (-5.30;-1.00) | 0.002     |
| Washout           | 21.17±1.70         | 21.00 (16.00;24.00)   | 27.56±2.99       | 26.00 (26.00;35.00)   | -5.00 (-7.00;-5.00) | <0.001    |
| 1st day           | 16.57±5.15         | 16.00 (10.00;33.00)   | 19.67±4.21       | 18.00 (14.00;26.00)   | -2.00 (-7.00;-0.01) | 0.039     |
| 7th day           | 17.34±2.91         | 16.00 (13.00;26.00)   | 19.33±7.12       | 17.00 (13.00;34.00)   | -1.00 (-4.00;2.00)  | 0.883     |
| 1st month         | 17.03±3.73         | 16.00 (10.00;29.00)   | 19.44±5.90       | 19.00 (11.00;33.00)   | -3.00 (-4.00;0.01)  | 0.064     |

| IOP<br>(mmHg) | IOP < 26     |                        | IOP ≥26    |                        | MD<br>(95%<br>CI)      | p*    |
|---------------|--------------|------------------------|------------|------------------------|------------------------|-------|
|               | Mean<br>(SD) | Median<br>(Range)      | Mean (SD)  | Median<br>(Range)      |                        |       |
| 3rd month     | 14.76±2.60   | 15.00<br>(9.00;25.00)  | 18.04±3.66 | 18.00<br>(12.00;24.00) | -3.00<br>(-5.00;-2.00) | 0.001 |
| 6th month     | 14.41±2.01   | 14.00<br>(10.00;19.00) | 17.19±3.58 | 16.50<br>(12.00;23.00) | -2.50<br>(-5.00;-1.00) | 0.006 |
| 12th month    | 15.45±2.35   | 16.00<br>(10.00;20.00) | 17.57±1.91 | 18.00<br>(14.00;20.00) | -2.00<br>(-2.00;-1.00) | 0.004 |
| 24th month    | 15.60±2.12   | 16.00<br>(11.00;20.00) | 18.56±1.81 | 19.00<br>(16.00;22.00) | -3.00<br>(-5.00;-1.00) | 0.001 |

\* Mann-Whitney U test, MD – difference in medians calculated as IOP< 26 group minus IOP ≥26 group with 95% confidence interval.

Table 5: Proportion of eyes with IOP reduction >50%, >40%, >30% and >20% by time points between groups.

| IOP<br>vs. baseline (washout) | reduction   |              |              |              |
|-------------------------------|-------------|--------------|--------------|--------------|
|                               | ≥50%        | ≥40%         | ≥30%         | ≥20%         |
| <b>1 month</b>                |             |              |              |              |
| IOP<26(n=54)                  | 2.9         | 2.9          | 17.1         | 40.0         |
| (%, 95% CI)                   | (0.1; 14.9) | (0.1; 14.9)  | (6.6; 33.7)  | (23.9; 57.9) |
| IOP ≥ 26 (n=18)               | 12.5        | 12.5         | 37.5         | 75.0         |
| (%, 95% CI)                   | (0.3; 52.7) | (0.3; 52.7)  | (8.5; 75.5)  | (34.9; 96.8) |
| *p                            | 0.341       | 0.341        | 0.332        | 0.118        |
| <b>3 months</b>               |             |              |              |              |
| IOP<26(n=51)                  | 3.9         | 7.8          | 23.5         | 52.9         |
| (%, 95% CI)                   | (0.5; 13.5) | (2.2; 18.9)  | (12.8; 37.5) | (38.5; 67.1) |
| IOP ≥ 26 (n = 17)             | 14.3        | 35.7         | 57.1         | 85.7         |
| (%, 95% CI)                   | (1.8; 42.8) | (12.8; 64.9) | (28.9; 82.3) | (57.2; 98.2) |
| *p                            | 0.200       | 0.018        | 0.023        | 0.033        |
| <b>6 months</b>               |             |              |              |              |
| IOP<26(n=52)                  | 0.0         | 8.9          | 31.1         | 57.8         |
| (%, 95% CI)                   | (0.0; 7.8)  | (2.5; 21.2)  | (18.2; 46.7) | (42.2; 72.3) |
| IOP ≥ 26 (n = 18)             | 15.4        | 30.8         | 69.2         | 92.3         |
| (%, 95% CI)                   | (1.9; 45.4) | (9.1; 61.4)  | (38;6; 91.0) | (64.0; 99.8) |
| *p                            | 0.047       | 0.066        | 0.023        | 0.023        |

| IOP reduction vs. baseline (washout) | reduction   |             |              |               |
|--------------------------------------|-------------|-------------|--------------|---------------|
|                                      | ≥50%        | ≥40%        | ≥30%         | ≥20%          |
| 12 months                            |             |             |              |               |
| IOP<26(n=50)                         | 0.0         | 2.3         | 15.9         | 43.2          |
| (%, 95% CI)                          | (0.0; 8.0)  | (0.1; 12.0) | (6.6; 30.0)  | (28.3; 58.9)  |
| IOP ≥ 26 (n = 17)                    | 0.0         | 16.7        | 66.7         | 100.0         |
| (%, 95% CI)                          | (0.0; 26.5) | (2.1; 48.4) | (34.9; 90.1) | (73.5; 100.0) |
| *p                                   | >0.999      | 0.113       | 0.001        | 0.001         |
| 24 months                            |             |             |              |               |
| IOP<26(n=49)                         | 0.0         | 2.9         | 25.7         | 51.4          |
| (%, 95% CI)                          | (0.0; 10.0) | (0.1; 14.9) | (12.5; 43.2) | (34.0; 68.6)  |
| IOP ≥ 26 (n = 16)                    | 0.0         | 0.0         | 50.0         | 87.5          |
| (%, 95% CI)                          | (0.0; 36.9) | (0.0; 36.9) | (15.7; 84.3) | (47.3; 99.7)  |
| *p                                   | >0.999      | >0.999      | 0.217        | 0.111         |

Data presented as % of patients with IOP reduction of >50%, >40%, >30% and >20% vs. baseline with 95% confidence interval. IOP washout level was used as baseline level. \* -  $\chi^2$  test or Fisher exact test.

Table 6: Amount of antiglaucoma medications before and 24 months after surgery

| Amount of Drugs | n  | Mean (SD) | Median (Range)   | MD (95% CI)         | p*     |
|-----------------|----|-----------|------------------|---------------------|--------|
| 0               | 72 | 1.75±0.89 | 1.50 (1.00;4.00) | -1.50 (-1.50;-1.00) | <0.001 |
| 24 months       | 65 | 0.50±0.90 | 0.00 (0.00;4.00) |                     |        |

\* Wilcoxon signed rank test, MD – difference in medians calculated as 24 months minus washout with 95% confidence interval.

Table 7: Amount of antiglaucoma medications: mean values, median values, standard deviations, and range between the groups at specific times after surgery

| Amount antiglaucoma medications | IOP < 26  |                  | IOP ≥ 26  |                  | MD (95% CI)         | p      |
|---------------------------------|-----------|------------------|-----------|------------------|---------------------|--------|
|                                 | Mean (SD) | Median (Range)   | Mean (SD) | Median (Range)   |                     |        |
| 0                               | 1.35±0.65 | 1.00 (0.00;3.00) | 2.89±1.18 | 3.00 (0.00;5.00) | -2.00 (-2.00;-1.00) | <0.001 |
| 6th month                       | 0.16±0.43 | 0.00 (0.00;2.00) | 1.25±1.00 | 2.00 (0.00;2.00) | -2.00 (-1.00;-0.01) | <0.001 |

|            |           |                     |           |                     |                        |        |
|------------|-----------|---------------------|-----------|---------------------|------------------------|--------|
| 12th month | 0.22±0.48 | 0.00<br>(0.00;2.00) | 1.38±1.04 | 2.00<br>(0.00;3.00) | -2.00<br>(-2.00;-0.01) | <0.001 |
| 24th month | 0.29±0.52 | 0.00<br>(0.00;2.00) | 1.33±1.50 | 1.00<br>(0.00;4.00) | -1.00<br>(-2.00;-0.01) | 0.026  |

\* Mann-Whitney U test, *MD* – difference in medians calculated as IOP washout < 26 group minus IOP washout ≥26 group with 95% confidence interval.

Table 8: Amount of antiglaucoma medications: mean values, median values, standard deviations, and range between the groups at specific times after surgery.

| Amount of Drugs | 0-1 medicine  |                                  | 2 medicines   |                     | 3-5 medicines |                                  | <i>p</i> |
|-----------------|---------------|----------------------------------|---------------|---------------------|---------------|----------------------------------|----------|
|                 | Mean (SD)     | Median (Range)                   | Mean (SD)     | Median (Range)      | Mean (SD)     | Median (Range)                   |          |
| 0               | 0.09<br>±0.43 | 0.00<br>(0.00;2.00)              | 0.00<br>±0.00 | 0.00<br>(0.00;0.00) | 0.00<br>±0.00 | 0.00<br>(0.00;0.00)              | 0.607    |
| 6th month       | 0.11<br>±0.42 | 0.00<br>(0.00;2.00) <sup>a</sup> | 0.32<br>±0.58 | 0.00<br>(0.00;2.00) | 0.91<br>±1.04 | 0.00<br>(0.00;2.00) <sup>a</sup> | 0.014    |
| 12th month      | 0.18<br>±0.50 | 0.00<br>(0.00;2.00) <sup>b</sup> | 0.31<br>±0.48 | 0.00<br>(0.00;1.00) | 1.11<br>±1.17 | 1.00<br>(0.00;3.00) <sup>b</sup> | 0.028    |
| 24th month      | 0.32<br>±0.57 | 0.00<br>(0.00;2.00)              | 0.23<br>±0.44 | 0.00<br>(0.00;1.00) | 1.00<br>±1.58 | 0.00<br>(0.00;4.00)              | 0.619    |

\* Kruskal-Wallis test. *a-b*: significant differences in Dunn *post-hoc* test (a: *p* = 0.006, b: *p* = 0.011).

Table 9. Multivariate regression analysis with Cox hazard ratio method

| Variable                | Coefficient | SE (coefficient) | <i>p</i> | Exp (coefficient) |
|-------------------------|-------------|------------------|----------|-------------------|
| Age, years              | -0.0004     | 0.02             | 0.981    | 0.99              |
| Sex                     | 0.18        | 0.40             | 0.654    | 1.19              |
| Medicines (0-1 vs. 2-5) | -0.01       | 0.31             | 0.967    | 0.98              |

Table 10: Best corrected visual acuity (BCVA) mean values, median values, standard deviations, and range between the groups at specific times after surgery.

| BCVA       | IOP < 26  |                     | IOP ≥26      |                     | MD<br>(95%<br>CI)      | p*    |
|------------|-----------|---------------------|--------------|---------------------|------------------------|-------|
|            | Mean (SD) | Median<br>(Range)   | Mean<br>(SD) | Median<br>(Range)   |                        |       |
| 0          | 0.51±0.24 | 0.50<br>(0.10;1.00) | 0.54±0.27    | 0.60<br>(0.02;1.00) | -0.10<br>(-0.20; 0.10) | 0.652 |
| 1st day    | 0.82±0.20 | 0.90<br>(0.30;1.00) | 0.75±0.14    | 0.70<br>(0.60;1.00) | 0.20<br>(-0.01; 0.20)  | 0.169 |
| 7th day    | 0.90±0.15 | 1.00<br>(0.50;1.00) | 0.86±0.17    | 1.00<br>(0.60;1.00) | 0.00<br>(-0.01; 0.20)  | 0.495 |
| 1st month  | 0.93±0.11 | 1.00<br>(0.63;1.00) | 0.97±0.15    | 1.00<br>(0.70;1.25) | 0.00<br>(-0.10; 0.01)  | 0.379 |
| 3rd month  | 0.88±0.20 | 1.00<br>(0.00;1.00) | 0.89±0.22    | 1.00<br>(0.20;1.00) | 0.00<br>(-0.01; 0.01)  | 0.636 |
| 6th month  | 0.90±0.18 | 1.00<br>(0.30;1.00) | 0.92±0.16    | 1.00<br>(0.60;1.25) | 0.00<br>(-0.01; 0.01)  | 0.937 |
| 12th month | 0.93±0.15 | 1.00<br>(0.40;1.00) | 0.93±0.13    | 1.00<br>(0.60;1.00) | 0.00<br>(-0.01;0.01)   | 0.869 |
| 24th month | 0.94±0.12 | 1.00<br>(0.60;1.00) | 0.91±0.18    | 1.00<br>(0.50;1.00) | 0.00<br>(-0.01; 0.01)  | 0.801 |

\* Mann-Whitney U test, MD – difference in medians calculated as IOP washout < 26 group minus IOP washout ≥26 group with 95% confidence interval.

Table 11: Best corrected visual acuity before and 24 months after surgery.

| VA        | n  | Mean (SD) | Median (Range)   | MD (95% CI)       | p*     |
|-----------|----|-----------|------------------|-------------------|--------|
| 0         | 65 | 0.56±0.24 | 0.60 (0.10;1.00) | 0.40 (0.30; 0.45) | <0.001 |
| 24 months | 65 | 0.94±0.13 | 1.00 (0.50;1.00) |                   |        |

\* Wilcoxon signed rank test, MD – difference in medians calculated as 24 months minus washout with 95% confidence interval.
